# Supplementary figures and images for: Assembly of a G-Quadruplex Repair Complex by the FANCJ DNA Helicase and the REV1 Polymerase
Source: MDPI journal article supplement (doi:10.3390/genes11010005), 2019-12-19

Figure S1

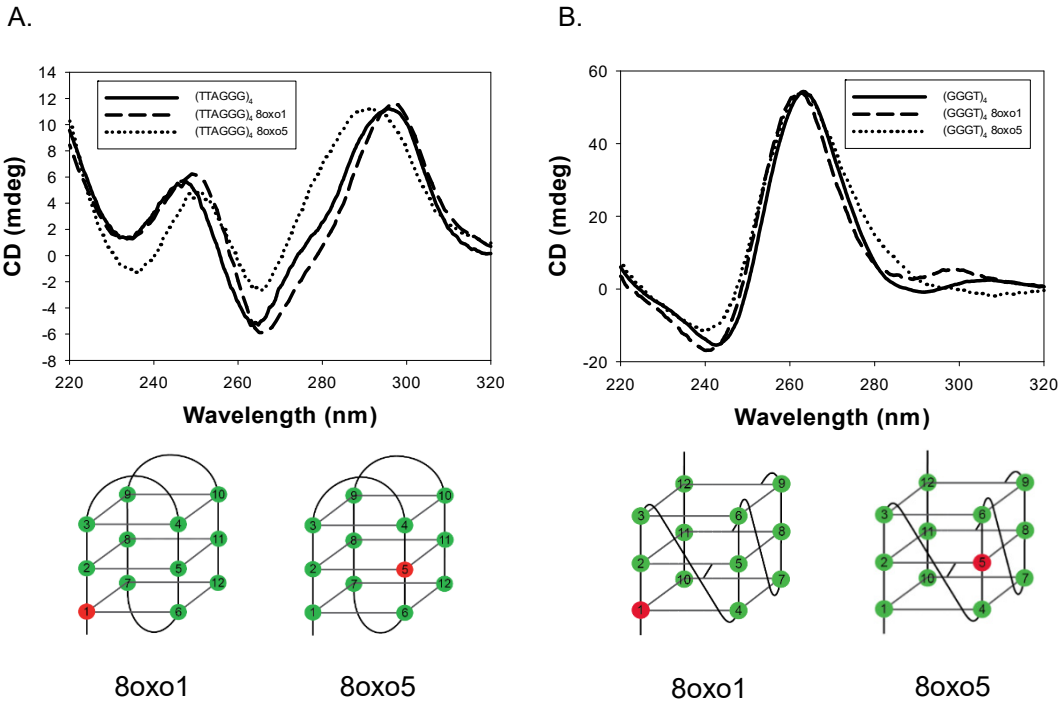

Figure S2

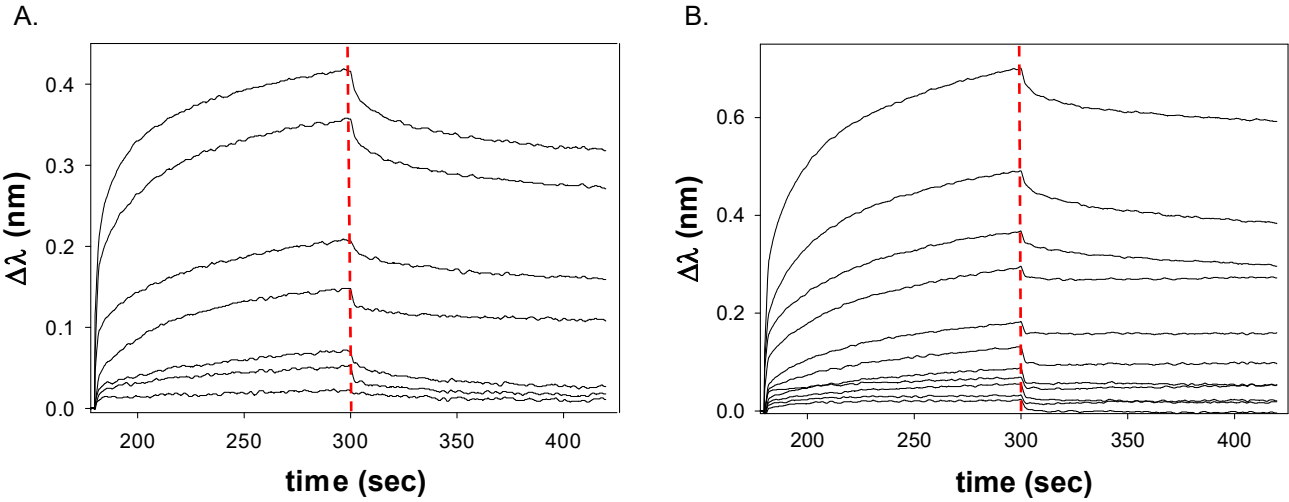

Figure S3

A.

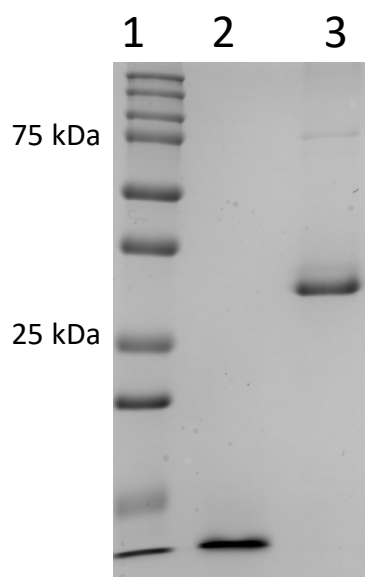

B.

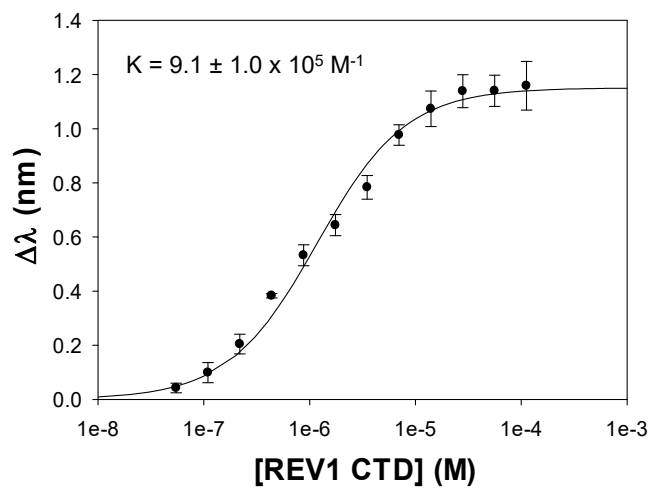

C.

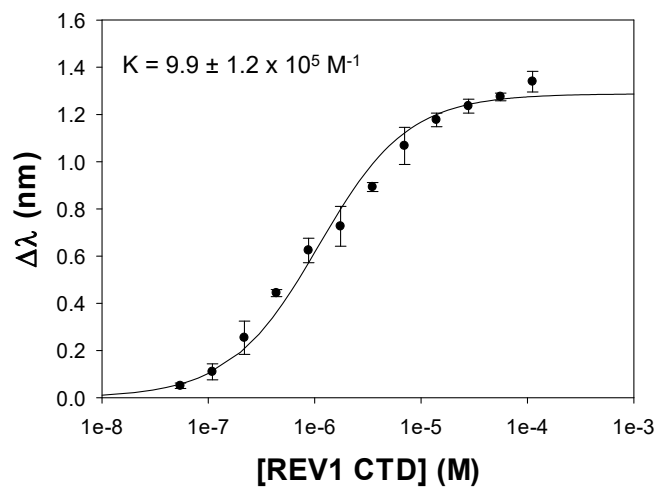

D.

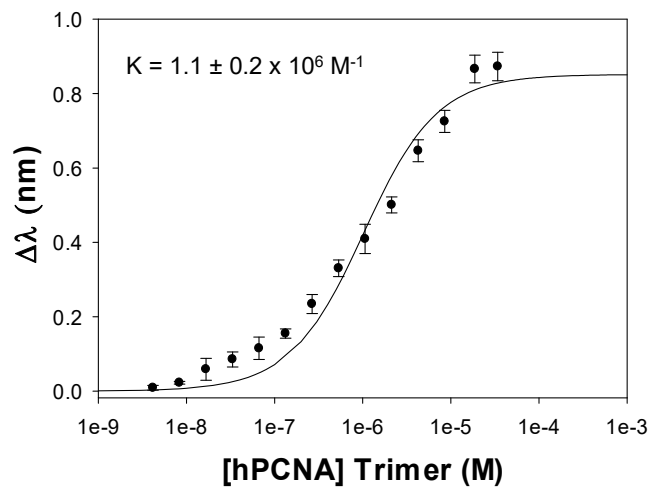

E.

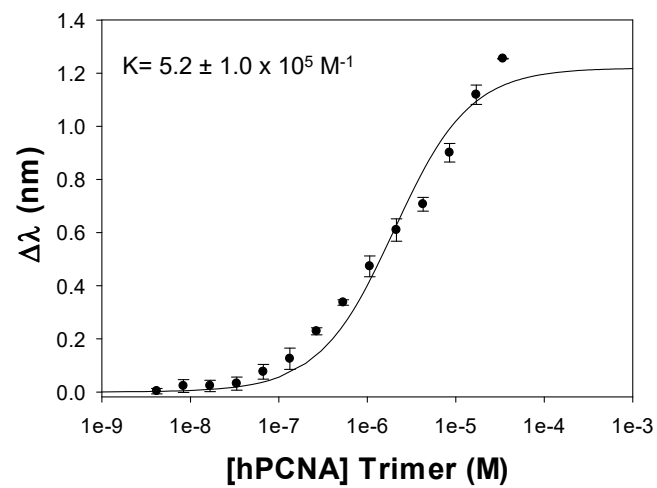

Supplement: s1 [file s1]
